# Supplementary material for: Broadband enhanced fluorescence using zinc-oxide nanoflower arrays
Source: Royal Society of Chemistry journal article supplement (doi:10.1039/c4tc02751e), 2015-01-01
Supplement: c4tc02751e1.pdf [file c4tc02751e1.pdf]

Supplementary Information

**Calculation of Surface area increase due to hexagonal-packed Polystyrene Spheres (PS)**

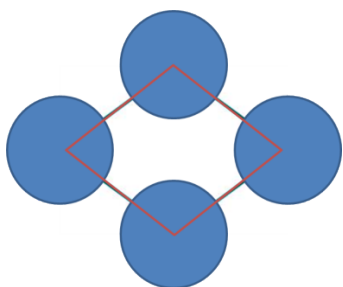

Figure 1. hexagonal packing of PS.

Assuming that the PS is essentially hemispheres on the substrate, then considering the area confined by the red lines in figure 1 we get the area that can be covered by nanorods with and without polystyrene spheres.:

1. Without PS:

$$S_{ns} = \cos 60^\circ \times 800^2 = 5.54 \times 10^5 \text{ nm}^2$$

2. With PS:

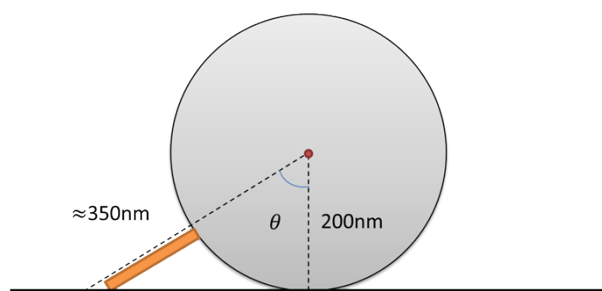

Figure 2. Side view of a PS with a NR on the edge of grown region on PS.

The increased area due to PS is the region that can develop a full-length NanoRod (NR). Assume the length of single NR,  $l_{NR}$ , is 150 nm and the diameter of PS is 400 nm (200 nm in radius,  $r_{PS}$ ).

The angle between the edge of grown region on PS and the normal to the substrate surface,  $\theta$ , (figure 2) is 0.963 radians:

The grown area on a single PS is:

$$S_{ps} = 4\pi r_{ps}^2 - \int_0^{0.963} 2\pi r_{ps}^2 \sin \theta d\theta = 3.96 \times 10^5 \text{ nm}^2$$

The area where NRs can grow now becomes:

$$S'_N = S_{ns} + S_{ps} - \text{area blocked by the PS} = 5.54 \times 10^5 + 3.96 \times 10^5 - \pi(r_{ps} + l_{nr})^2 = 5.65 \times 10^5 \text{ nm}^2$$

Hence the ratio of surface areas where nanorods can grow is given by:

$$\frac{S'_N}{S_{np}} = 1.02$$

### **Increase in surface area for fluorophore attachment**

SEM images can now be used to find the areal density for both the nanorods and nanoflower arrays.

For aligned nanorods (NRs):

The counted areal density of NRs,  $\rho_{NR}$ , is found to be  $1.04 \times 10^{-4}$  nanorods.nm<sup>2</sup>

The fraction of the surface area that can be used for growing nanorods,  $f_{nrs}$  is:

$$f_{nrs} = \frac{S_{np} \cdot \rho_{NR} \cdot \pi r_{nr}^2}{S_{np}} = 0.523$$

Where  $r_{nr}$  is the radius of the nanorods

Hence we can now find a value of the surface area that fluorophores can attach given by:

$$S'_{NR} = (1 - f_{nrs})S_{np} + S_{np} \rho_{NR} (2\pi r_{nr} l_{nr} + \pi r_{nr}^2) = 3.17 \times 10^6 \text{ nm}^2$$

The ratio of available surface areas where fluorophores can attach is now given by:

$$\frac{S''_{NR}}{S_{np}} = 5.7$$

For Nanoflowers (NF):

Since  $\frac{S'_N}{S_{np}} = 1.02$  the projection area of  $S'_N$  is approximately the same as that without PS when counting the areal density of NRs on the PS that form the nanoflowers (NF).

In this case counted areal density of nanorods,  $\rho_{NRF}$  is  $1.65 \times 10^{-4}$  nanorods.nm<sup>-2</sup>.

The fraction of the surface area that can be used for growing nanorods as nanoflowers,  $f_{nfs}$  is:

$$f_{nfs} = \frac{S_{np} \cdot \rho_{NRF} \cdot \pi r_{nrf}^2}{S_{np}} = 0.467$$

Where  $r_{nrf}$  is the radius of the nanorods used in the nanoflower array.

Hence we can now find a value of the surface area that fluorophores can attach given by:

$$S'_{NF} = (1 - f_{nfs})S_{np} + S_{np}\rho_{NRF}(2\pi r_{nrf}l_{nrf} + \pi r_{nrf}^2) = 3.20 \times 10^6 \text{ nm}^2$$

Where  $l_{nrf}$  is the length of the nanorods used in the nanoflower arrays.

The ratio of available surface areas where fluorophores can attach is now given by:

$$\frac{S''_{NF}}{S_{np}} = 5.77$$

### **Scattering properties of aligned nanorods and nanoflowers**

The scattering properties of aligned nanorods and nanoflowers were investigated by measuring the total and diffuse reflectance in a Cary 5000 UV-VIS-NIR spectrophotometer. The results are shown in Figure 3. Absorbance of light was observed for all spectra at about 370nm- the band-gap energy of bulk ZnO (3.37eV). Comparing the data at 420nm, total reflectance and diffuse reflectance of nano-flower is 1.37 and 5.70 times as high as those of aligned nano-rods. Diffuse reflection is the predominant reflection for nanoflowers, the ratios of diffuse to total reflectance are 23.4% and 97.6% for aligned nano-rods and nano-flowers respectively. The capability for nanoflowers to scatter the light rather is verified and indicates a strong degree of randomness in the fabricated array.

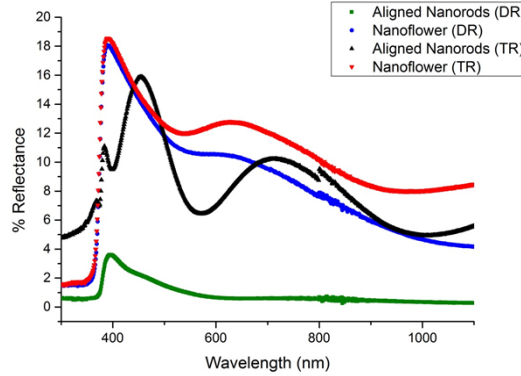

Figure 3. Total reflectance (TR) and diffuse reflectance (DR) of glass, aligned nanorods and nanoflower.
